# Supplementary material
Source: publisher site journal article supplement (https://www.dovepress.com/article/381825)
Supplement: Supplementary file 1 [file get_supplementary_file.php]

Table S1 The 616 gene list

|         |         |         |         |         |        |                    |         |           |         |
|---------|---------|---------|---------|---------|--------|--------------------|---------|-----------|---------|
| ABCB1   | ATRX    | BTK     | CDK6    | CYP2C8  | EPAS1  | FAM58A (CCNQ)      | FOXA1   | H3F3C     | ID3     |
| ABCC4   | AURKA   | FANCA   | CDK8    | CYP2D6  | EPCAM  | C11orf30 (EMSY)    | FOXL2   | HAS3      | IDH1    |
| ABCC6   | AURKB   | C8orf34 | CDKN1A  | CYP3A5  | EPHA3  | FANCC              | FOXO1   | HDAC1     | IDH2    |
| ABL1    | AXIN1   | CALR    | CDKN1B  | CYP4B1  | EPHA5  | FANCD2             | FOXP1   | HGF       | IFNGR1  |
| ABL2    | AXIN2   | CAPG    | CDKN2A  | CYSLTR2 | EPHA7  | FANCE              | FRS2    | HIST1H1C  | IGF1    |
| ACTG1   | AXL     | CARD11  | CDKN2B  | DAXX    | EPHB1  | FANCF              | FUBP1   | HIST1H2BD | IGF1R   |
| ACVR1   | B2M     | CARM1   | CDKN2C  | DCBLD1  | EPHB4  | FANCG              | FYN     | HIST1H3A  | IGF2    |
| ACVR1B  | BABAM1  | CASP7   | CEBPA   | DCK     | ERBB2  | FANCL              | GABRA6  | HIST1H3B  | IKBKE   |
| AGO2    | BAP1    | CASP8   | CENPA   | DCUN1D1 | ERBB3  | FAS                | GATA1   | HIST1H3C  | IKZF1   |
| AKT1    | BARD1   | CBFB    | CHD2    | DDR1    | ERBB4  | FAT1               | GATA2   | HIST1H3D  | IL10    |
| AKT2    | BBC3    | CBL     | CHD4    | DDR2    | ERCC1  | FBXW7              | GATA3   | HIST1H3E  | IL7R    |
| AKT3    | BCL10   | CBR3    | CHEK1   | DICER1  | ERCC2  | FGD4               | GATA4   | HIST1H3F  | INHA    |
| ALK     | BCL2    | CCND1   | CHEK2   | DIS3    | ERCC3  | FGF10              | GATA6   | HIST1H3G  | INHBA   |
| ALOX12B | BCL2L1  | CCND2   | CIC     | DNAJB1  | ERCC4  | FGF12              | GGH     | HIST1H3H  | INPP4A  |
| Amel    | BCL2L11 | CCND3   | CREBBP  | DNMT1   | ERCC5  | GID4 (C17orf39)    | FGF14   | HIST1H3I  | INPP4B  |
| FGF19   | BCL2L2  | CCNE1   | CRKL    | DNMT3A  | ERF    | AMER1 (FAM123B)    | GLI1    | HIST1H3J  | INPPL1  |
| ANKRD11 | BCL6    | CD22    | CRLF2   | DNMT3B  | ERG    | FGF23              | GNA11   | HIST2H3C  | INSR    |
| APC     | BCOR    | FGF3    | CSDE1   | DOT1L   | ERRFI1 | CD274 (PD-L1)      | GNA13   | HIST2H3D  | IRF2    |
| AR      | BCORL1  | CD276   | CSF1R   | DPYD    | ESR1   | FGF4               | GNAQ    | HIST3H3   | IRF4    |
| ARAF    | BCR     | CD3EAP  | CSF3R   | DROSHA  | ETV1   | FGF6               | GNAS    | HLA-A     | IRS1    |
| ARFRP1  | BIRC3   | CD70    | CTCF    | DUSP4   | ETV4   | GPR124 (ADGRA2)    | FGFR1   | HLA-B     | IRS2    |
| ARID1A  | BLM     | CD74    | CTLA4   | E2F3    | ETV5   | FGFR2              | GPS2    | HLA-C     | JAK1    |
| ARID1B  | BMPR1A  | CD79A   | CTNNA1  | EED     | ETV6   | FGFR3              | GREM1   | HLA-DQB1  | JAK2    |
| ARID2   | BRAF    | CD79B   | CTNNA1  | EGFL7   | EWSR1  | FGFR4              | GRIN2A  | HLA-DRB1  | JAK3    |
| ARID5B  | BRCA1   | CDA     | CUL3    | EGFR    | EXO1   | FH                 | GRM3    | HNF1A     | JUN     |
| ASXL1   | BRCA2   | CDC42   | CUL4A   | EIF1AX  | EZH1   | KAT6A (MYST3)      | GSK3B   | HOXB13    | FLCN    |
| ASXL2   | BRD4    | CDC73   | CXCR4   | EIF4A2  | EZH2   | FLT1               | GSTA1   | HRAS      | KDM5A   |
| ATM     | BRIP1   | CDH1    | CYLD    | EIF4E   | EZR    | FLT3               | GSTP1   | HSD3B1    | KDM5C   |
| ATP7A   | BTG1    | CDK12   | CYP17A1 | ELF3    | FLT4   | FAM175A (ABRAXAS1) | H3F3A   | HSP90AA1  | KDM6A   |
| ATR     | BTG2    | CDK4    | CYP19A1 | EP300   | FAM46C | FOLR3              | H3F3B   | ICOSLG    | KDR     |
| WWTR1   | XIAP    | XPC     | XPO1    | XRCC1   | XRCC2  | YAP1               | YES1    | ZBTB2     | ZFHX3   |
| KEAP1   | MAPKAP1 | MYC     | NUF2    | PIK3R1  | PTPRD  | PARK2 (PRKN)       | SH2B3   | SPOP      | TIPARP  |
| KEL     | MAX     | RNF43   | NUP93   | PIK3R2  | PTPRO  | MYCL (MYCL1)       | SH2D1A  | SPRED1    | TMEM127 |
| KIT     | MCL1    | MYCN    | NUTM1   | PIK3R3  | PTPRS  | TNFRSF14           | SHOC2   | SPTA1     | TMPRSS2 |
| KLF4    | MDC1    | MYD88   | OPRM1   | PIM1    | PTPRT  | RPS6KA4            | SHQ1    | SRC       | TNFAIP3 |
| KLHL6   | MDM2    | MYOD1   | P2RY8   | PLCG2   | QKI    | RPS6KB2            | SLC10A2 | SRSF2     | ROS1    |
| KMT2A   | MDM4    | NAT2    | PAK1    | PLK2    | RAB35  | RPTOR              | SLC19A1 | STAG2     | TOP1    |
| RRAGC   | MED12   | NBN     | PAK3    | PMAIP1  | RAC1   | KMT2A (MLL)        | SLC29A1 | STAT3     | TOP2A   |
| KMT2B   | MEF2B   | NCOA3   | RRAS    | PMS1    | RAC2   | PAK7 (PAK5)        | SLC34A2 | STAT4     | TP53    |
| RRAS2   | MEN1    | NCOR1   | PALB2   | PMS2    | RAD21  | KMT2C (MLL3)       | SLCO1B1 | STAT5A    | TP53BP1 |
| RRM1    | MERTK   | NEGR1   | RIT1    | PNRC1   | RAD50  | KMT2D (MLL2)       | SLCO1B3 | STAT5B    | TP63    |

|         |        |        |         |         |        |                          |         |        |        |
|---------|--------|--------|---------|---------|--------|--------------------------|---------|--------|--------|
| KNSTRN  | MET    | NF1    | PARP1   | POLD1   | RAD51  | RSPO2                    | SLIT2   | STK11  | TRAF2  |
| KRAS    | MGA    | NF2    | PARP2   | POLE    | RAD51B | RTEL1                    | SLX4    | STK19  | TRAF7  |
| LATS1   | MITF   | NFE2L2 | PARP3   | PPARG   | RAD51C | RUNX1                    | SMAD2   | STK40  | TSC1   |
| LATS2   | MKNK1  | NFKBIA | PAX5    | PPM1D   | RAD51D | RUNX1T1                  | SMAD3   | SUFU   | TSC2   |
| LMO1    | MLH1   | NKX2-1 | PBRM1   | PPP2R1A | RAD52  | RXRA                     | SMAD4   | SUZ12  | TSHR   |
| LRP1B   | MPL    | NKX3-1 | PDCD1   | PPP2R2A | RAD54L | RYBP                     | SMARCA4 | SYK    | TSPY1  |
| LTK     | SDHA   | NOS3   | SDC4    | PPP4R2  | RAF1   | PDCD1LG2 (PD-L2)         | SMARCB1 | TAF1   | TYMS   |
| LYN     | MSH2   | NOTCH1 | PDGFRA  | PPP6C   | RANBP2 | MRE11A (MRE11)           | SMARCD1 | TAP1   | TYRO3  |
| LZTR1   | MSH3   | NOTCH2 | PDGFRB  | PRDM1   | RARA   | SDHAF2                   | SMO     | TAP2   | U2AF1  |
| MAF     | MSH6   | NOTCH3 | PDK1    | PRDM14  | RASA1  | SDHB                     | SMYD3   | TBX3   | UBE2I  |
| MAGI2   | MSI1   | NOTCH4 | PDPK1   | PREX2   | RB1    | TCEB1 (ELOC)             | SNCAIP  | SDHC   | UGT1A3 |
| MALT1   | MSI2   | NPM1   | PGR     | PRKAR1A | RBM10  | SDHD                     | SOCS1   | TCF3   | UMPS   |
| SEMA3C  | MST1   | NQO1   | PHOX2B  | PRKCI   | RECQL  | MAP2K1 (MEK1)            | SOD2    | TCF7L2 | UPF1   |
| SESN1   | MST1R  | NRAS   | PIK3C2B | PRKD1   | RECQL4 | MAP2K2 (MEK2)            | SOS1    | TEK    | VEGFA  |
| MAP2K4  | MTAP   | NSD1   | PIK3C2G | PRKDC   | REL    | HIST1H3F                 | SOX10   | TERC   | VHL    |
| MAP3K1  | MTHFR  | NT5C2  | PIK3C3  | PRSS8   | RET    | TERT (Promoter included) | SOX17   | SESN3  | VTCN1  |
| MAP3K13 | MTOR   | NTHL1  | PIK3CA  | PTCH1   | SETD2  | RFWD2 (COP1)             | SOX2    | TET1   | SGK1   |
| MAP3K14 | MTR    | NTRK1  | PIK3CB  | PTEN    | RHEB   | SETD8 (KMT5A)            | SOX9    | TET2   | SF3B1  |
| MAPK1   | MUTYH  | NTRK2  | PIK3CD  | PTP4A1  | RHOA   | WHSC1L1 (NSD3)           | SPEN    | TGFBR1 | WISP3  |
| MAPK3   | MYB    | NTRK3  | PIK3CG  | PTPN11  | RICTOR | WHSC1 (NSD2)             | SPG7    | TGFBR2 | WT1    |
| ZNF217  | ZNF703 | GATA3  | CTNNA1  | CSF1R   | SESN2  |                          |         |        |        |

Table S2 The clinical information of the 220 patients

| ID            | age | sex    | smoking | stage | pathology                       | KRAS mutation | best efficacy | ID             | age | sex    | smoking | stage | pathology                       | KRAS mutation | best efficacy |
|---------------|-----|--------|---------|-------|---------------------------------|---------------|---------------|----------------|-----|--------|---------|-------|---------------------------------|---------------|---------------|
| UAGBN7WY34    | 79  | Female | NA      | IV    | Lung adenocarcinoma             | G12D          | SD            | PM00G19BN0479  | 52  | male   | yes     | IV    | Lung adenocarcinoma             | WT            | SD            |
| UAGBN8WY46    | 54  | male   | yes     | IV    | Sarcomatoid carcinoma           | G12F          | PR            | UAGBN20716     | 81  | male   | yes     | III   | squamous cell carcinoma         | WT            | SD            |
| UAGBN6GK50    | 51  | male   | yes     | III   | Lung adenocarcinoma             | G13D          | PR            | PM00G19BN0030  | 76  | male   | yes     | III   | squamous cell carcinoma         | WT            | PR            |
| UAGBN9Y753    | 58  | male   | yes     | IV    | Lung adenocarcinoma             | G12C          | PR            | UAGBN53874     | 71  | male   | yes     | IV    | Lung adenocarcinoma             | WT            | PD            |
| UAGBN9Y876    | 58  | male   | yes     | IV    | Lung adenocarcinoma             | G12C          | PR            | PM00G18BN0200  | 63  | male   | NA      | I     | Lung adenocarcinoma             | WT            | SD            |
| UAGBN9Y881    | 66  | male   | NA      | IV    | Lung adenocarcinoma             | G12C          | PR            | UAGBN0A995     | 80  | male   | NA      | III   | squamous cell carcinoma         | WT            | PR            |
| UAGBN8X773    | 67  | male   | yes     | IV    | Lung adenocarcinoma             | G12V          | PR            | UAGBN20709     | 60  | Female | NA      | IV    | Lung adenocarcinoma             | WT            | PR            |
| UAGBN0E757    | 72  | male   | yes     | IV    | Lung adenocarcinoma             | G12D          | PR            | UAGBN9Y664     | 49  | male   | NA      | III   | Lung adenocarcinoma             | WT            | SD            |
| 7             | 62  | male   | yes     | III   | Lung adenocarcinoma             | G12C          | PR            | UAGBN9Y797     | 49  | male   | NA      | III   | squamous cell carcinoma         | WT            | PD            |
| PM00G19BN0630 | 72  | Female | NA      | IV    | Lung adenocarcinoma             | G12V          | PD            | UAGBN9Y877     | 56  | Female | NA      | IV    | Lung adenocarcinoma             | WT            | PR            |
| PM00G19BN0368 | 74  | male   | yes     | IV    | Lung adenocarcinoma             | G12C          | PR            | UAGBN9Y885     | 65  | Female | NA      | IV    | Lung adenocarcinoma             | WT            | SD            |
| PM00G18BN0210 | 62  | male   | yes     | IV    | Lung adenocarcinoma             | G12C          | PR            | UAGBN8X768     | 56  | Female | NA      | IV    | Lung adenocarcinoma             | WT            | SD            |
| UAGBN5GK86    | 66  | Female | NA      | IV    | Lung adenocarcinoma             | G12D          | PD            | PM00G18BN0090  | 65  | male   | yes     | IV    | squamous cell carcinoma         | WT            | SD            |
| UAGBN6GK01    | 67  | male   | yes     | IV    | Lung adenocarcinoma             | G12V          | PR            | UAGBN9Y741     | 70  | male   | yes     | IV    | squamous cell carcinoma         | WT            | PR            |
| UAGBN8X799    | 72  | male   | yes     | IV    | Lung adenocarcinoma             | G12V          | PD            | PM00G19BN0363  | 73  | male   | NA      | II    | Lung adenocarcinoma             | WT            | PD            |
| UAGBN8X796    | 56  | Female | NA      | IV    | Lung adenocarcinoma             | G12D          | PD            | PM00G19BN0429  | 64  | male   | yes     | IV    | Sarcomatoid carcinoma           | WT            | SD            |
| UAGBN2M034    | 74  | male   | NA      | III   | Lung adenocarcinoma             | G12C          | PR            | UAGBN7GK97     | 66  | Female | yes     | III   | Lung adenocarcinoma             | WT            | NA            |
| UAGBN84789    | 54  | Female | NA      | IV    | Lung adenocarcinoma             | G12D          | PR            | UAGBN9Y734     | 58  | male   | yes     | III   | poorly differentiated carcinoma | WT            | PR            |
| UAGBN84759    | 43  | male   | yes     | IV    | squamous cell carcinoma         | G12C          | PD            | PM00G19BN0301  | 56  | male   | NA      | IV    | Lung adenocarcinoma             | WT            | NA            |
| UAGBN53872    | 52  | male   | yes     | IV    | Lung adenocarcinoma             | G12C          | PD            | UAGBN20720     | 50  | male   | NA      | IV    | Lung adenocarcinoma             | WT            | NA            |
| PM00G19BN0664 | 50  | male   | yes     | III   | Lung adenocarcinoma             | G12V          | SD            | PM00G19BN0202  | 62  | male   | yes     | III   | squamous cell carcinoma         | WT            | PR            |
| PM00G18BN0092 | 76  | male   | yes     | IV    | Lung adenocarcinoma             | G13D          | SD            | UAGBN8X797     | 52  | Female | NA      | IV    | Lung adenocarcinoma             | WT            | PR            |
| PM00G19BN0145 | 71  | Female | NA      | II    | Lung adenocarcinoma             | G12C          | PD            | UAGBN8X784     | 58  | male   | yes     | IV    | Lung adenocarcinoma             | WT            | PR            |
| UAGBN84764    | 60  | male   | yes     | I     | Lung adenocarcinoma             | G12C          | PR            | UAGBN8X731     | 69  | Female | NA      | IV    | neuroendocrine carcinoma        | WT            | PR            |
| UAGBN7WY15    | 67  | male   | yes     | IV    | Lung adenocarcinoma             | G12D          | SD            | UAGBN84757     | 52  | Female | NA      | IV    | Lung adenocarcinoma             | WT            | PR            |
| UAGBN6GK09    | 28  | Female | NA      | IV    | Lung adenocarcinoma             | G12V          | PD            | UAGBN67807     | 45  | male   | NA      | IV    | Lung adenocarcinoma             | WT            | PR            |
| UAGBN6GK98    | 53  | male   | yes     | IV    | Lung adenocarcinoma             | G12C          | SD            | UAGBN53902     | 58  | Female | NA      | IV    | Lung adenocarcinoma             | WT            | PR            |
| UAGBN7GK52    | 75  | male   | NA      | IV    | Lung adenocarcinoma             | G12C          | SD            | UAGBN53849     | 52  | male   | yes     | IV    | Lung adenocarcinoma             | WT            | SD            |
| UAGBN7GK67    | 73  | male   | yes     | IV    | Lung adenocarcinoma             | G12C          | SD            | UAGBN20736     | 58  | Female | NA      | IV    | Lung adenocarcinoma             | WT            | SD            |
| UAGBN1W859    | 54  | male   | NA      | IV    | Lung adenocarcinoma             | G12V          | PR            | UAGBN20739     | 48  | male   | NA      | III   | Lung adenocarcinoma             | WT            | PR            |
| UAGBN1W854    | 58  | male   | yes     | IV    | neuroendocrine carcinoma        | G12C          | SD            | PM00G19BN0551R | 57  | Female | NA      | IV    | Lung adenocarcinoma             | WT            | SD            |
| UAGBN2M024    | 45  | Female | NA      | IV    | poorly differentiated carcinoma | G12C          | PR            | PM00G19BN0571  | 78  | Female | yes     | IV    | Lung adenocarcinoma             | WT            | PR            |
| UAGBN2M049    | 69  | male   | NA      | IV    | Lung adenocarcinoma             | G12D          | SD            | PM00G19BN0448  | 37  | male   | yes     | IV    | Lung adenocarcinoma             | WT            | PR            |
| UAGBN2M072    | 83  | Female | NA      | III   | Lung adenocarcinoma             | G12D          | PR            | UAGBN67798     | 72  | male   | yes     | IV    | squamous cell carcinoma         | WT            | PR            |
| UAGBN3H323    | 59  | male   | yes     | IV    | Lung adenocarcinoma             | G12C, A146P   | PR            | PM00G19BN0032  | 69  | male   | NA      | IV    | squamous cell carcinoma         | WT            | PD            |
| UAGBN3H316    | 31  | male   | yes     | IV    | Lung adenocarcinoma             | G12C          | PR            | PM00G19BN0644  | 45  | male   | yes     | III   | neuroendocrine carcinoma        | WT            | PR            |
| UAGBN3H058    | 62  | male   | yes     | IV    | Lung adenocarcinoma             | G12D          | PR            | UAGBN9Y738     | 62  | male   | yes     | IV    | squamous cell carcinoma         | WT            | PD            |

|               |    |        |     |     |                                 |            |    |               |    |        |     |     |                         |    |    |
|---------------|----|--------|-----|-----|---------------------------------|------------|----|---------------|----|--------|-----|-----|-------------------------|----|----|
| UAGBN0E770    | 51 | male   | yes | IV  | Lung adenocarcinoma             | G12C       | SD | UAGBN9Y882    | 63 | male   | yes | III | Lung adenocarcinoma     | WT | SD |
| UAGBN84779    | 57 | Female | NA  | III | poorly differentiated carcinoma | G12D       | SD | UAGBN8X785    | 51 | Female | NA  | III | Lung adenocarcinoma     | WT | SD |
| UAGBN53888    | 26 | Female | NA  | IV  | Lung adenocarcinoma             | G12D       | PD | UAGBN8X737    | 68 | Female | NA  | IV  | Lung adenocarcinoma     | WT | PR |
| UAGBN53895    | 54 | Female | NA  | IV  | Lung adenocarcinoma             | Q61R       | PR | UAGBN3H314    | 48 | male   | yes | IV  | Lung adenocarcinoma     | WT | PR |
| UAGBN53851    | 71 | Female | NA  | IV  | Lung adenocarcinoma             | G12D       | PD | UAGBN9Y855    | 54 | Female | NA  | IV  | Lung adenocarcinoma     | WT | SD |
| UAGBN20711    | 81 | male   | yes | IV  | Lung adenocarcinoma             | G12F       | PR | UAGBN9Y718    | 68 | Female | NA  | IV  | Lung adenocarcinoma     | WT |    |
| UAGBN20734    | 51 | male   | yes | IV  | Lung adenocarcinoma             | G12V       | SD | UAGBN9Y740    | 79 | Female | NA  | IV  | Lung adenocarcinoma     | WT | SD |
| PM00G19BN0700 | 49 | male   | yes | IV  | Lung adenocarcinoma             | G12C       | SD | UAGBN9Y754    | 48 | Female | NA  | IV  | Lung adenocarcinoma     | WT |    |
| PM00G19BN0473 | 55 | male   | yes | IV  | Lung adenocarcinoma             | G12V       | PR | UAGBN9Y767    | 71 | male   | NA  | III | Lung adenocarcinoma     | WT |    |
| PM00G19BN0183 | 63 | male   | yes | IV  | Lung adenocarcinoma             | G12V       | SD | UAGBN9Y790    | 64 | male   | NA  | 0   | Lung adenocarcinoma     | WT |    |
| PM00G19BN0111 | 50 | Female | NA  | II  | Lung adenocarcinoma             | G12D       | PD | UAGBN9Y910    | 42 | Female | NA  | I   | Lung adenocarcinoma     | WT |    |
| PM00G19BN0016 | 73 | male   | yes | IV  | Lung adenocarcinoma             | G12D       | SD | UAGBN8X805    | 64 | male   | NA  | II  | Lung adenocarcinoma     | WT |    |
| PM00G18BN0138 | 65 | male   | NA  | IV  | Lung adenocarcinoma             | G12C       | PR | UAGBN8X774    | 66 | Female | NA  | IV  | Lung adenocarcinoma     | WT |    |
| PM00G18BN0030 | 62 | male   | yes | IV  | Lung adenocarcinoma             | G12C       | SD | UAGBN8X770    | 55 | Female | NA  | 0   | Lung adenocarcinoma     | WT |    |
| PM00G18BN0083 | 66 | Female | NA  | IV  | Lung adenocarcinoma             | G12C       | SD | UAGBN8X743    | 68 | male   | NA  | I   | Lung adenocarcinoma     | WT |    |
| PM00G19BN0043 | 76 | male   | yes | III | Lung adenocarcinoma             | G12D       | PR | UAGBN8X763    | 74 | male   | NA  | IV  | Lung adenocarcinoma     | WT |    |
| UAGBN0A992    | 81 | male   | NA  | IV  | Lung adenocarcinoma             | G12D       | NA | UAGBN8X741    | 75 | male   | yes | III | Lung adenocarcinoma     | WT |    |
| PM00G18BN0074 | 79 | male   | yes | IV  | Lung adenocarcinoma             | G12C       | NA | UAGBN8X738    | 38 | male   | yes | IV  | Lung adenocarcinoma     | WT |    |
| UAGBN8WY78    | 61 | Female | NA  | IV  | Lung adenocarcinoma             | G12D       | PR | UAGBN3H325    | 54 | Female | NA  | IV  | Lung adenocarcinoma     | WT |    |
| UAGBN7WY03    | 69 | male   | yes | IV  | Lung adenocarcinoma             | G12C       | NA | UAGBN67795    | 44 | Female | NA  | IV  | Lung adenocarcinoma     | WT |    |
| UAGBN6GK62    | 55 | male   | yes | IV  | Lung adenocarcinoma             | G12C       | NA | UAGBN67796    | 63 | Female | NA  | IV  | Lung adenocarcinoma     | WT |    |
| UAGBN6GK70    | 77 | male   | yes | IV  | Lung adenocarcinoma             | G12C       | NA | UAGBN67800    | 54 | Female | NA  | IV  | Lung adenocarcinoma     | WT |    |
| UAGBN9Y751    | 83 | male   | yes | IV  | Lung adenocarcinoma             | G12A       | PR | UAGBN67792    | 69 | Female | NA  | IV  | Lung adenocarcinoma     | WT |    |
| UAGBN1W860    | 77 | male   | NA  | IV  | Lung adenocarcinoma             | G12D       | NA | UAGBN67801    | 45 | male   | NA  | IV  | Lung adenocarcinoma     | WT |    |
| PM00G19BN0490 | 53 | Female | NA  | II  | Lung adenocarcinoma             | G12C       | SD | UAGBN53893    | 72 | Female | NA  | III | Lung adenocarcinoma     | WT |    |
| PM00G19BN0519 | 63 | Female | NA  | NA  | Lung adenocarcinoma             | G12V       | SD | PM00G19BN0722 | 68 | male   | yes | IV  | squamous cell carcinoma | WT |    |
| PM00G19BN0386 | 73 | male   | yes | IV  | Sarcomatoid carcinoma           | G12C       | PD | PM00G19BN0669 | 29 | male   | NA  | IV  | Lung adenocarcinoma     | WT |    |
| PM00G19BN0230 | 62 | male   | yes | II  | Lung adenocarcinoma             | G12D       | PR | PM00G19BN0624 | 72 | male   | yes | IV  | squamous cell carcinoma | WT |    |
| UAGBN84790    | 62 | male   | yes | IV  | Lung adenocarcinoma             | G12C       | NA | PM00G19BN0626 | 68 | male   | yes | IV  | Lung adenocarcinoma     | WT |    |
| UAGBN84773    | 57 | male   | yes | IV  | Lung adenocarcinoma             | G12V       | NA | PM00G19BN0596 | 55 | male   | yes | IV  | Lung adenocarcinoma     | WT |    |
| UAGBN2M028    | 69 | male   | NA  | IV  | Lung adenocarcinoma             | G12C,G12V  | NA | PM00G19BN0528 | 39 | Female | NA  | IV  | Lung adenocarcinoma     | WT |    |
| UAGBN67814    | 62 | Female | NA  | IV  | squamous cell carcinoma         | G12R       | NA | PM00G19BN0541 | 57 | Female | NA  | IV  | Lung adenocarcinoma     | WT |    |
| PM00G19BN0150 | 54 | male   | NA  | III | Lung adenocarcinoma             | G12D       | NA | PM00G19BN0474 | 42 | male   | NA  | III | squamous cell carcinoma | WT |    |
| UAGBN2M062    | 70 | Female | NA  |     | squamous cell carcinoma         | G12A,A146T | NA | PM00G19BN0350 | 55 | male   | NA  | IV  | Lung adenocarcinoma     | WT |    |
| PM00G19BN0534 | 64 | Female | NA  | IV  | Lung adenocarcinoma             | G12V       | NA | PM00G19BN0362 | 53 | Female | NA  | IV  | Lung adenocarcinoma     | WT |    |
| PM00G19BN0351 | 71 | Female | NA  | IV  | Lung adenocarcinoma             | G12D       | NA | PM00G19BN0369 | 69 | Female | NA  | IV  | Lung adenocarcinoma     | WT |    |
| PM00G19BN0161 | 77 | male   | yes | IV  | squamous cell carcinoma         | Q61H       | NA | PM00G19BN0302 | 65 | Female | NA  | IV  | Lung adenocarcinoma     | WT |    |
| PM00G19BN0133 | 72 | male   | yes | IV  | Lung adenocarcinoma             | G12A       | NA | PM00G19BN0308 | 48 | Female | NA  | III | Lung adenocarcinoma     | WT |    |
| PM00G19BN0140 | 61 | Female | NA  | IV  | Lung adenocarcinoma             | G12D       | NA | PM00G19BN0245 | 57 | male   | NA  | IV  | Lung adenocarcinoma     | WT |    |
| PM00G19BN0159 | 69 | male   | yes | IV  | Lung adenocarcinoma             | G12C       | NA | PM00G19BN0160 | 56 | Female | NA  | IV  | Lung adenocarcinoma     | WT |    |
| PM00G18BN0187 | 70 | Female | NA  | IV  | squamous cell carcinoma         | G12R       | NA | PM00G19BN0177 | 65 | Female | NA  | IV  | Lung adenocarcinoma     | WT |    |
| UAGBN7WY07    | 69 | male   | yes | IV  | Lung adenocarcinoma             | G12C       | NA | PM00G19BN0115 | 68 | Female | NA  | IV  | Lung adenocarcinoma     | WT |    |
| UAGBN7WY37    | 76 | male   | yes | III | Lung adenocarcinoma             | G12C       | NA | PM00G19BN0069 | 37 | male   | yes | III | Lung adenocarcinoma     | WT |    |

|               |    |        |     |     |                         |      |    |               |    |        |     |     |                         |    |  |
|---------------|----|--------|-----|-----|-------------------------|------|----|---------------|----|--------|-----|-----|-------------------------|----|--|
| UAGBN7GK87    | 78 | Female | NA  | II  | Lung adenocarcinoma     | G12C | NA | UAGBN8X766    | 51 | male   | NA  | IV  | Lung adenocarcinoma     | WT |  |
| UAGBN53847    | 65 | male   | yes | IV  | Lung adenocarcinoma     | Q61H | NA | UAGBN1W846    | 38 | male   | NA  | IV  | Lung adenocarcinoma     | WT |  |
| PM00G19BN0712 | 69 | male   | yes | IV  | Lung adenocarcinoma     | G12C | NA | UAGBN1W829    | 60 | male   | NA  | IV  | Lung adenocarcinoma     | WT |  |
| PM00G19BN0379 | 62 | male   | yes | IV  | Lung adenocarcinoma     | G12C | NA | UAGBN1W804    | 57 | male   | NA  | IV  | squamous cell carcinoma | WT |  |
| UAGBN5GK63    | 74 | male   | yes | III | Lung adenocarcinoma     | G12V | NA | UAGBN2M029    | 58 | Female | NA  | IV  | Lung adenocarcinoma     | WT |  |
| UAGBN5GK71    | 81 | Female | NA  | IV  | Lung adenocarcinoma     | G12D | NA | UAGBN2M050    | 50 | male   | NA  | IV  | Lung adenocarcinoma     | WT |  |
| UAGBN2M037    | 52 | male   | yes | IV  | Lung adenocarcinoma     | G12D | NA | UAGBN2M067    | 54 | male   | NA  | IV  | Lung adenocarcinoma     | WT |  |
| UAGBN2M041    | 68 | male   | yes | IV  | Lung adenocarcinoma     | G12C | NA | UAGBN3H298    | 50 | Female | NA  | IV  | Lung adenocarcinoma     | WT |  |
| UAGBN84891    | 48 | Female | NA  | IV  | Lung adenocarcinoma     | G12D | NA | UAGBN0E795    | 54 | male   | yes | II  | Lung adenocarcinoma     | WT |  |
| UAGBN84902    | 41 | Female | NA  | IV  | Lung adenocarcinoma     | G12D | NA | UAGBN0E789    | 78 | male   | yes | IV  | Lung adenocarcinoma     | WT |  |
| UAGBN1A023    | 60 | male   | NA  | IV  | Lung adenocarcinoma     | G12D | NA | UAGBN0E783    | 74 | Female | NA  | IV  | Lung adenocarcinoma     | WT |  |
| PM00G19BN0250 | 81 | male   | NA  | IV  | Lung adenocarcinoma     | G12V | NA | UAGBN0E782    | 77 | Female | NA  | IV  | Lung adenocarcinoma     | WT |  |
| UAGBN20730    | 55 | male   | yes | IV  | Lung adenocarcinoma     | WT   | PR | UAGBN0E773    | 45 | Female | NA  | IV  | Lung adenocarcinoma     | WT |  |
| PM00G19BN0622 | 53 | male   | yes | IV  | Lung adenocarcinoma     | WT   | PR | UAGBN0E764    | 63 | Female | NA  | IV  | Lung adenocarcinoma     | WT |  |
| PM00G19BN0361 | 79 | male   | yes | III | Lung adenocarcinoma     | WT   | PR | UAGBN84890    | 66 | male   | NA  | IV  | Lung adenocarcinoma     | WT |  |
| UAGBN84800    | 68 | male   | NA  | IV  | Lung adenocarcinoma     | WT   | SD | UAGBN84898    | 63 | male   | NA  | IV  | squamous cell carcinoma | WT |  |
| UAGBN20718    | 65 | male   | yes | III | squamous cell carcinoma | WT   | PD | UAGBN84903    | 39 | Female | NA  | IV  | Lung adenocarcinoma     | WT |  |
| UAGBN20723    | 72 | Female | NA  | IV  | Lung adenocarcinoma     | WT   | PD | UAGBN84900    | 48 | Female | NA  | III | Lung adenocarcinoma     | WT |  |
| UAGBN0E744    | 74 | male   | yes | IV  | squamous cell carcinoma | WT   | SD | UAGBN84911    | 50 | Female | NA  | IV  | Lung adenocarcinoma     | WT |  |
| UAGBN84782    | 66 | male   | yes | III | Lung adenocarcinoma     | WT   | SD | UAGBN1A029    | 57 | male   | NA  | IV  | Lung adenocarcinoma     | WT |  |
| UAGBN0E755    | 61 | male   | NA  | IV  | Lung adenocarcinoma     | WT   | PD | UAGBN1A013    | 52 | male   | NA  | IV  | Lung adenocarcinoma     | WT |  |
| UAGBN53852    | 52 | Female | NA  | IV  | NA                      | WT   | PD | UAGBN1A002    | 54 | Female | yes | IV  | squamous cell carcinoma | WT |  |
| PM00G19BN0110 | 63 | male   | yes | IV  | squamous cell carcinoma | WT   | SD | UAGBN84775    | 50 | Female | NA  | III | Lung adenocarcinoma     | WT |  |
| UAGBN20712    | 76 | male   | yes | IV  | Lung adenocarcinoma     | WT   | PD | PM00G19BN0725 | 57 | male   | NA  | IV  | Lung adenocarcinoma     | WT |  |
| UAGBN1A003    | 48 | male   | NA  | IV  | Lung adenocarcinoma     | WT   | SD | PM00G19BN0604 | 61 | Female | NA  | IV  | Lung adenocarcinoma     | WT |  |
| UAGBN84781    | 59 | male   | yes | IV  | Lung adenocarcinoma     | WT   | PR | PM00G19BN0559 | 49 | Female | yes | IV  | Lung adenocarcinoma     | WT |  |
| UAGBN1A001    | 66 | male   | yes | IV  | Lung adenocarcinoma     | WT   | SD | PM00G19BN0428 | 51 | Female | NA  | IV  | Lung adenocarcinoma     | WT |  |
| PM00G19BN0666 | 76 | male   | yes | IV  | squamous cell carcinoma | WT   | SD | PM00G19BN0344 | 50 | male   | NA  | IV  | Lung adenocarcinoma     | WT |  |
| UAGBN3H066    | 45 | male   | yes | IV  | Lung adenocarcinoma     | WT   | PR | PM00G19BN0208 | 53 | Female | NA  | IV  | Lung adenocarcinoma     | WT |  |
| UAGBN84909    | 55 | male   | NA  | IV  | Lung adenocarcinoma     | WT   | PD | PM00G19BN0113 | 62 | Female | NA  | IV  | Lung adenocarcinoma     | WT |  |

Table S3 The PFS and OS of KRAS-mutant patients and non-KRAS-mutant patients with immunotherapy.

| ID            | Class         | Status | PFS | OS   | ID            | Class   | Status | PFS | OS  |
|---------------|---------------|--------|-----|------|---------------|---------|--------|-----|-----|
| UAGBN7WY34    | KRAS_Mutation | 1      | 90  | 270  | UAGBN3H066    | KRAS_WT | 1      | 250 | 600 |
| UAGBN8WY46    | KRAS_Mutation | 1      | 73  | 225  | UAGBN84909    | KRAS_WT | 2      | 45  | 162 |
| UAGBN6GK50    | KRAS_Mutation | 1      | 160 | 245  | PM00G19BN0479 | KRAS_WT | 2      | 90  | 854 |
| UAGBN9Y753    | KRAS_Mutation | 1      | 63  | 213  | UAGBN20716    | KRAS_WT | 2      | 53  | 192 |
| UAGBN9Y876    | KRAS_Mutation | 1      | 435 | 435  | PM00G19BN0030 | KRAS_WT | 2      | 197 | 197 |
| UAGBN9Y881    | KRAS_Mutation | 1      | 377 | 465  | UAGBN53874    | KRAS_WT | 2      | 15  | 429 |
| UAGBN8X773    | KRAS_Mutation | 1      | 427 | 502  | PM00G18BN0200 | KRAS_WT | 2      | 133 | 474 |
| UAGBN0E757    | KRAS_Mutation | 2      | 51  | 399  | UAGBN0A995    | KRAS_WT | 1      | 137 | 686 |
| UAGBN67815    | KRAS_Mutation | 1      | 230 | 750  | UAGBN20709    | KRAS_WT | 1      | 417 | 797 |
| PM00G19BN0368 | KRAS_Mutation | 1      | 360 | 1042 | UAGBN9Y664    | KRAS_WT | 1      | 106 | 414 |
| PM00G18BN0210 | KRAS_Mutation | 2      | 840 | 870  | UAGBN9Y797    | KRAS_WT | 1      | 50  | 268 |
| UAGBN5GK86    | KRAS_Mutation | 2      | 28  | NA   | UAGBN9Y877    | KRAS_WT | 1      | 120 | 230 |
| UAGBN6GK01    | KRAS_Mutation | 1      | 720 | 1045 | UAGBN9Y885    | KRAS_WT | 1      | 22  | 438 |
| UAGBN8X799    | KRAS_Mutation | 1      | 43  | NA   | UAGBN8X768    | KRAS_WT | 1      | 170 | 495 |
| UAGBN2M034    | KRAS_Mutation | 2      | 120 | 134  | PM00G18BN0090 | KRAS_WT | 2      | 30  | 59  |
| UAGBN84789    | KRAS_Mutation | 1      | 60  | 491  | UAGBN9Y741    | KRAS_WT | 1      | 181 | 421 |
| PM00G19BN0664 | KRAS_Mutation | 1      | 173 | 810  | PM00G19BN0363 | KRAS_WT | 2      | 128 | 128 |
| PM00G18BN0092 | KRAS_Mutation | 1      | 120 | 549  | UAGBN7GK97    | KRAS_WT | 1      | NA  | 120 |
| PM00G19BN0145 | KRAS_Mutation | 2      | 30  | 600  | UAGBN9Y734    | KRAS_WT | 1      | NA  | 396 |
| UAGBN84764    | KRAS_Mutation | 1      | 360 | 711  | PM00G19BN0301 | KRAS_WT | 2      | NA  | NA  |
| PM00G19BN0622 | KRAS_WT       | 1      | 120 | MA   | UAGBN20720    | KRAS_WT | NA     | NA  | NA  |
| PM00G19BN0361 | KRAS_WT       | 1      | 136 | NA   | PM00G19BN0202 | KRAS_WT | 2      | NA  | NA  |
| UAGBN84800    | KRAS_WT       | 1      | 70  | NA   | UAGBN20712    | KRAS_WT | 2      | 48  | 60  |
| PM00G19BN0429 | KRAS_WT       | 2      | 60  | NA   | UAGBN1A003    | KRAS_WT | 2      | 15  | 142 |
| UAGBN20718    | KRAS_WT       | 2      | 60  | 390  | UAGBN84781    | KRAS_WT | 2      | 70  | 154 |
| UAGBN20723    | KRAS_WT       | 2      | 101 | 144  | UAGBN1A001    | KRAS_WT | 1      | 107 | 691 |
| UAGBN0E744    | KRAS_WT       | 2      | 40  | 323  | PM00G19BN0666 | KRAS_WT | 2      | 120 | 777 |
| UAGBN84782    | KRAS_WT       | 1      | 236 | 684  | UAGBN53852    | KRAS_WT | 2      | 30  | 120 |
| UAGBN0E755    | KRAS_WT       | 2      | 44  | 75   | PM00G19BN0110 | KRAS_WT | 2      | 210 | 420 |

Table S4 The PFS and OS of the patients with KRAS mutations with immunotherapy and chemotherapy

| ID            | Class | Status | PFS | OS   | ID            | Class | Status | PFS | OS   |
|---------------|-------|--------|-----|------|---------------|-------|--------|-----|------|
| UAGBN7WY34    | Immu  | 1      | 90  | 270  | UAGBN3H323    | Chemo | 1      | 111 | 484  |
| UAGBN8WY46    | Immu  | 1      | 73  | 225  | UAGBN3H316    | Chemo | 1      | 60  | 604  |
| UAGBN6GK50    | Immu  | 1      | 160 | 245  | UAGBN3H058    | Chemo | 2      | 140 | 90   |
| UAGBN9Y753    | Immu  | 1      | 63  | 213  | UAGBN0E770    | Chemo | 2      | 22  | 71   |
| UAGBN9Y876    | Immu  | 1      | 435 | 435  | UAGBN53888    | Chemo | 2      | 21  | 58   |
| UAGBN9Y881    | Immu  | 1      | 377 | 465  | UAGBN53895    | Chemo | 1      | 146 | 784  |
| UAGBN8X773    | Immu  | 1      | 427 | 502  | UAGBN53851    | Chemo | 2      | 67  | 77   |
| UAGBN0E757    | Immu  | 2      | 51  | 399  | UAGBN20734    | Chemo | 2      | 42  | 177  |
| UAGBN67815    | Immu  | 1      | 230 | 750  | PM00G19BN0700 | Chemo | 1      | 176 | 863  |
| PM00G19BN0368 | Immu  | 1      | 360 | 1042 | PM00G19BN0473 | Chemo | 2      | 183 | 311  |
| PM00G18BN0210 | Immu  | 2      | 840 | 870  | PM00G19BN0111 | Chemo | 2      | 38  | 53   |
| UAGBN5GK86    | Immu  | 2      | 28  |      | PM00G19BN0016 | Chemo | 2      | 40  | 81   |
| UAGBN6GK01    | Immu  | 1      | 720 | 1045 | PM00G18BN0138 | Chemo | 2      | 420 | 450  |
| UAGBN8X799    | Immu  | 1      | 43  |      | PM00G18BN0030 | Chemo | 2      | 217 | 340  |
| UAGBN2M034    | Immu  | 2      | 120 | 134  | PM00G18BN0083 | Chemo | 2      | 170 |      |
| UAGBN84789    | Immu  | 1      | 60  | 491  | PM00G19BN0043 | Chemo | 2      | 210 |      |
| PM00G19BN0664 | Immu  | 1      | 173 | 810  | UAGBN8WY78    | Chemo | 1      | 510 |      |
| PM00G18BN0092 | Immu  | 1      | 120 | 549  | UAGBN7WY03    | Chemo | 1      |     | 180  |
| PM00G19BN0145 | Immu  | 2      | 30  | 600  | UAGBN6GK62    | Chemo | 1      |     | 282  |
| UAGBN84764    | Immu  | 1      | 360 | 711  | UAGBN6GK70    | Chemo | 2      | 1   | 139  |
| UAGBN7WY15    | Chemo | 1      | 73  | 180  | UAGBN1W860    | Chemo | 2      |     | 372  |
| UAGBN6GK09    | Chemo | 1      | 27  | 268  | PM00G19BN0490 | Chemo | 1      |     | 941  |
| UAGBN6GK98    | Chemo | 1      | 23  | 333  | PM00G19BN0519 | Chemo | 1      |     | 1000 |
| UAGBN7GK52    | Chemo | 2      | 45  | 210  | PM00G19BN0386 | Chemo | 2      | 24  |      |
| UAGBN7GK67    | Chemo | 1      | 165 | 354  | PM00G19BN0230 | Chemo | 2      | 90  |      |
| UAGBN1W859    | Chemo | 1      | 120 | 499  | UAGBN84790    | Chemo | 1      | 75  | 704  |
| UAGBN1W854    | Chemo | 2      | 86  | 183  | UAGBN2M028    | Chemo | 2      |     | 105  |
| UAGBN2M024    | Chemo | 1      | 70  | 860  | PM00G19BN0150 | Chemo | 1      |     |      |
| UAGBN2M049    | Chemo | 1      | 246 | 540  | UAGBN2M062    | Chemo | 1      |     |      |
| UAGBN2M072    | Chemo | 1      | 245 | 241  | UAGBN7WY07    | Chemo | 2      |     |      |

Table S5 The PFS and OS of the patients with KRAS G12C mutations and non-KRAS G12C mutations with immunotherapy

| <b>ID</b>     | <b>Class</b>  | <b>Status</b> | <b>PFS</b> | <b>OS</b> |
|---------------|---------------|---------------|------------|-----------|
| UAGBN7WY34    | KRAS_non_G12C | 1             | 90         | 270       |
| UAGBN8WY46    | KRAS_non_G12C | 1             | 73         | 225       |
| UAGBN6GK50    | KRAS_non_G12C | 1             | 160        | 245       |
| UAGBN9Y753    | KRAS_G12C     | 1             | 63         | 213       |
| UAGBN9Y876    | KRAS_G12C     | 1             | 435        | 435       |
| UAGBN9Y881    | KRAS_G12C     | 1             | 377        | 465       |
| UAGBN8X773    | KRAS_non_G12C | 1             | 427        | 502       |
| UAGBN0E757    | KRAS_non_G12C | 2             | 51         | 399       |
| UAGBN67815    | KRAS_G12C     | 1             | 230        | 750       |
| PM00G19BN0368 | KRAS_G12C     | 1             | 360        | 1042      |
| PM00G18BN0210 | KRAS_G12C     | 2             | 840        | 870       |
| UAGBN5GK86    | KRAS_non_G12C | 2             | 28         | 135       |
| UAGBN6GK01    | KRAS_non_G12C | 1             | 720        | 1045      |
| UAGBN8X799    | KRAS_non_G12C | 1             | 43         | 216       |
| UAGBN2M034    | KRAS_G12C     | 2             | 120        | 134       |
| UAGBN84789    | KRAS_non_G12C | 1             | 60         | 491       |
| PM00G19BN0664 | KRAS_non_G12C | 1             | 173        | 810       |
| PM00G18BN0092 | KRAS_non_G12C | 1             | 120        | 549       |
| PM00G19BN0145 | KRAS_G12C     | 2             | 30         | 600       |
| UAGBN84764    | KRAS_G12C     | 1             | 360        | 711       |
